# Supplementary material for: Investigating the Role of OrbF in Biofilm Biosynthesis and Regulation of Biofilm-Associated Genes in Bacillus cereus BC1
Source: MDPI journal article supplement (doi:10.3390/foods13050638), 2024-02-20
Supplement: s1 [file s1]

## Supplementary Materials

### Supplementary Figures

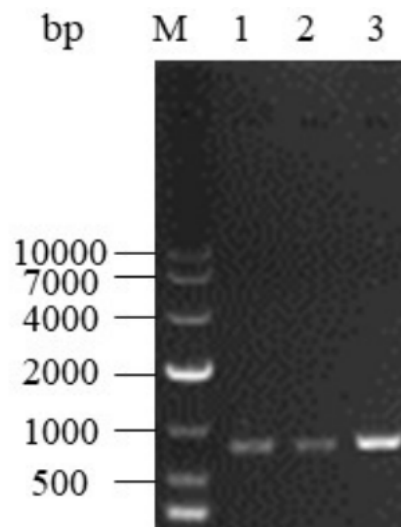

**Figure S1.** PCR amplification of *orbF* gene. M: 10000 DNA marker; lane 1 to lane 3: PCR product (*orbF*). The PCR product of *orbF* is 714 bp.

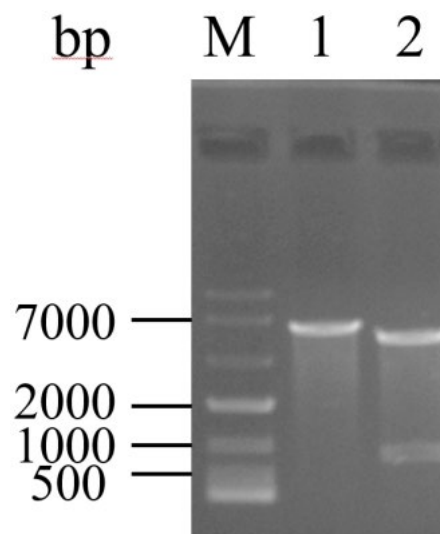

**Figure S2.** Enzyme analysis of pET-28a-*orbF*. M: 10000 DNA marker; lane 1: pET-28a-*orbF*; lane 2: pET-28a (the top strip, 5369bp) and *orbF* (the bottom strip, 714bp).

## Supplementary Tables

**Table S1** Strains and plasmids used in this study

| Strains/Plasmids            | Description                                                                    | Source         |
|-----------------------------|--------------------------------------------------------------------------------|----------------|
| Strains                     |                                                                                |                |
| <i>Bacillus cereus</i> BC1  | Isolated from pasteurized milk                                                 | Lab collection |
| <i>E. coli</i> DH5 $\alpha$ | Storage plasmids                                                               | Invitrogen     |
| <i>E. coli</i> BL21         | Host for protein expression                                                    | Invitrogen     |
| BC1 $\Delta orbF$           | In-frame deletion of <i>orbF</i> in <i>Bacillus cereus</i> BC1                 | This work      |
| BC1 $\Delta orbF :: orbF$   | Ectopic expression gene <i>orbF</i> in $\Delta orbF$                           | This work      |
| BL21/ <i>orbF</i>           | <i>E. coli</i> BL21 containing pET-28a- <i>orbF</i> , host for OrbF expression | This work      |
| Plasmids                    |                                                                                |                |
| pMarA-TnYLB-1               | Construct transposon mutagenesis library                                       | [20]           |
| pHT304-TS                   | Knockout gene                                                                  | [24]           |
| pHT304                      | Complement gene                                                                | [25]           |
| pHT304-TS- <i>orbF</i>      | Knockout the gene <i>orbF</i>                                                  | This work      |
| pHT304- <i>orbF</i>         | Complement the gene <i>orbF</i>                                                | This work      |
| pET-28a                     | Expression of protein                                                          | Invitrogen     |
| pET-28a- <i>orbF</i>        | Expression of OrbF                                                             | This work      |
| pMD19T                      | Ligation of promoter                                                           | Invitrogen     |
| pMD19T-Promoter             | Ligation of promoter                                                           | This work      |

**Table S2** Primers used in this study

| Primers            | Sequence (5'-3')                                        | Note                                                                           |
|--------------------|---------------------------------------------------------|--------------------------------------------------------------------------------|
| oIPCR-F            | GCTTGTA AATTCTATCATAATTG                                | Confirm transposon insertion site                                              |
| oIPCR-R            | AGGGAATCATTGAAGGTTGG                                    |                                                                                |
| <i>orbF</i> -F     | ctcgagtgcggccgcaagcttATGAAAGATATACGTATCCTTA             | Amplification of <i>orbF</i> gene                                              |
| <i>orbF</i> -R     | atgggtcgcggatccgaattcTCAGTCTTCAAGCTTTTCACCTA            |                                                                                |
| <i>orbF</i> up-F   | ACCATGATTACGCCAAGCTTTCAACTAGGTGCTTTAAGTTATTTG           | Amplification of <i>orbF</i> up homologous arm,<br>Knockout gene <i>orbF</i>   |
| <i>orbF</i> up-R   | CAGGTGAAGATATGAAAGATGTGAAAAGCTTGAAGACTGATAAAAC          |                                                                                |
| <i>orbF</i> down-F | TCAGTCTTCAAGCTTTTCACATCTTTCATATCTTCACCTGCTTC            | Amplification of <i>orbF</i> down homologous arm,<br>Knockout gene <i>orbF</i> |
| <i>orbF</i> down-R | CGACGTTGTAAAACGACGGCCAGTGAATTCAACTCTCCAATAAAGTTAGTTTGTC |                                                                                |
| <i>orbF</i> -CP-F  | ACCATGATTACGCCAAGCTTATGAAAGATATACGTATCCTTA              | Amplification of <i>orbF</i> gene for complementation                          |
| <i>orbF</i> -CP-R  | AAACGACGGCCAGTGAATTCTCAGTCTTCAAGCTTTTCACCTA             |                                                                                |
| 09870-F            | GTGTAGGAGCGGTTACTACT                                    | RT-qPCR                                                                        |
| 09870-R            | TTAATGCAGAAGGCCCCATC                                    | RT-qPCR                                                                        |
| 02475-F            | AATGGTTAGGTTTCTTTGCT                                    | RT-qPCR                                                                        |
| 02475-R            | CCTGAACCAATTGCACCTAA                                    | RT-qPCR                                                                        |
| 20040-F            | CACGCATTGCGTCAGTAATA                                    | RT-qPCR                                                                        |
| 20040-R            | ATGGTATTCATATTCACCCT                                    | RT-qPCR                                                                        |
| 12220-F            | TGATACACTAAAATACCTAA                                    | RT-qPCR                                                                        |
| 12220-R            | AAATATATGTTACCCCTCGA                                    | RT-qPCR                                                                        |
| 20050-F            | GAAACCAACGTTTGTAACGC                                    | RT-qPCR                                                                        |

---

|         |                       |         |
|---------|-----------------------|---------|
| 20050-R | AAACGTTAGCGATTGTTGCA  | RT-qPCR |
| 18065-F | GCACAAC TTCAGCACCTTCT | RT-qPCR |
| 18065-R | CATGGGGAATCAGATAGATT  | RT-qPCR |
| fliE-F  | TGTAGTTGAGGGGAAAAAGT  | RT-qPCR |
| fliE-R  | TACCCCTTTAGTTAGTAAAT  | RT-qPCR |
| flgK-F  | TGGCAAAAAATCCAGAACAA  | RT-qPCR |
| flgK-R  | TGCTTCCACTGTATCTAAGT  | RT-qPCR |
| flhA-F  | AGAGTTATTAGCGCATGAAG  | RT-qPCR |
| flhA-R  | AACGAGTGCGAATGGTAGAA  | RT-qPCR |
| flgG-F  | TGAGAAGAGTGAGATGTTAA  | RT-qPCR |
| flgG-R  | TGCTGCCTTAATAATGAACG  | RT-qPCR |
| fliH-F  | ATGAACAAATGGAACAGATG  | RT-qPCR |
| fliH-R  | TGCTAAATGAAATGATTGAT  | RT-qPCR |
| fliP-F  | AAGGACTTGGGGTAATGAAT  | RT-qPCR |
| fliP-R  | CACATCACTCTTCAGTTGCC  | RT-qPCR |
| flgB-F  | GATGAATAAAAGTAGTGCAT  | RT-qPCR |
| flgB-R  | ATTTACTGTCGGCAAGTGCA  | RT-qPCR |
| fliQ-F  | AAGTCTGATTGTCGTTATTA  | RT-qPCR |
| fliQ-R  | GAGGACAATACTCGCCATTT  | RT-qPCR |
| motP-F  | GTCTAAAAAGCACGGCTTGC  | RT-qPCR |

---

---

|         |                      |         |
|---------|----------------------|---------|
| motP-R  | ATCGTAACCGCTTAACATTA | RT-qPCR |
| 24915-F | ACAACATTTTGAATCGATCC | RT-qPCR |
| 24915-R | GCGGAAGAGGCGTCTAAGCA | RT-qPCR |
| motB-F  | GAGGTGACGCTGAAACAAGT | RT-qPCR |
| motB-R  | AGGGATTAATGGTGACAATA | RT-qPCR |
| 08250-F | AGTGGAAACTGAGATTGTAG | RT-qPCR |
| 08250-R | TAACTGGCTGATTAAAAGC  | RT-qPCR |
| fliM-F  | GTCACAGACGTTATCAGCGC | RT-qPCR |
| fliM-R  | CGGCATTTTCTCCACATATT | RT-qPCR |
| 17405-F | ACATGACTAATTGTCTTAGT | RT-qPCR |
| 17405-R | TACGAAAGAAATTGAAGAAG | RT-qPCR |
| motA-F  | TGACCTAACTTTTCAATATC | RT-qPCR |
| motA-R  | GCTATTTTTTCACAAGCTGG | RT-qPCR |
| fliN-F  | TATTGATACTGTTTCAGATA | RT-qPCR |
| fliN-R  | AACATCGCCAACTTTTAACT | RT-qPCR |
| fliG-F  | ATATAATCTGATCGGTAAAT | RT-qPCR |
| fliG-R  | CAAGCAATAACAGATGAATT | RT-qPCR |
| 05470-F | CATTTACAATAAAGTAGCGG | RT-qPCR |
| 05470-R | ATTCAGGTTTTAACATGAAT | RT-qPCR |
| 26465-F | GTGGAAAGATAATCAAGCAC | RT-qPCR |

---

---

|         |                      |         |
|---------|----------------------|---------|
| 26465-R | CGGCATCGGGATGGTCCTCG | RT-qPCR |
| 02195-F | TATGACGTCACCGAAAGATT | RT-qPCR |
| 02195-R | CTGTTTGTCTAAGATGATT  | RT-qPCR |
| 10660-F | TGAATTATTAATGGCAGCTC | RT-qPCR |
| 10660-R | TAGACTTTTGTTTCATGCCT | RT-qPCR |
| 09340-F | GATAATTATTTACATTGCAC | RT-qPCR |
| 09340-R | AGCTGCCATCCCTGCCCCTA | RT-qPCR |
| 10665-F | TCGATTTATGTTGTCGTTGT | RT-qPCR |
| 10665-R | GAATACAACGGATTTTATA  | RT-qPCR |
| 09335-F | AGTGGGCTCTTGAGCGGAGG | RT-qPCR |
| 09335-R | CTCCACCATTATCGGGGATA | RT-qPCR |

---
